# Supplementary material for: Flexible photodetector from ultraviolet to near infrared based on a SnS2 nanosheet microsphere film
Source: Royal Society of Chemistry journal article supplement (doi:10.1039/c4tc02325k), 2014-12-08
Supplement: c4tc02325k1.pdf [file c4tc02325k1.pdf]

## Supporting Information

# Flexible photodetector from ultraviolet to near infrared based on SnS<sub>2</sub> nanosheet microsphere film

Yourong Tao, Xingcai Wu\*, Wei Wang, and Jianan Wang

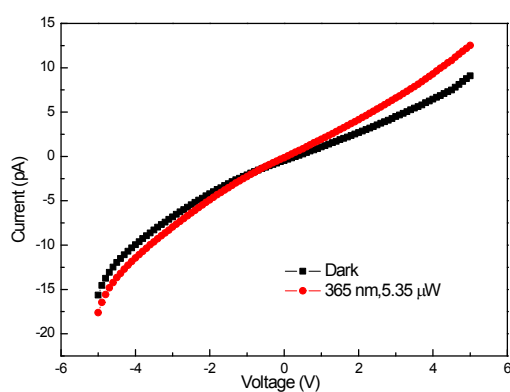

Fig. S1 *I-V* curves of device 2 under UV and dark
